# Supplementary material for: bcSeq: an R package for fast sequence mapping in high-throughput shRNA and CRISPR screens
Source: Oxford University Press journal article supplement (doi:10.1093/bioinformatics/bty402), 2018-05-15
Supplement: bioinformatics_34_20_3581_s2.zip [file bioinformatics_34_20_3581_s2.zip]

Archive with 2 entries (2 files):
- BIOINF-2017-2201.R1-SI.pdf
- Scripts.zip
